# Supplementary material for: Intrarenal pressure monitoring in retrograde intrarenal surgery for high- infectious risk populations
Source: Research Square preprint supplement (doi:10.21203/rs.3.rs-8790860/v1), 2026-02-11
Supplement: Supplementary file 1 [file 377217fcf21dbe36e2d60595.docx]

**Supplementary Table 1:**

| **Gram-positive cocci** | n (%) |
| --- | --- |
| *Enterococcus faecalis* | 20 (19.2) |
| *Streptococcus agalactiae* | 7 (6.7) |
| Coagulase-Negative Staphylococci | 7 (6.7) |
| *Staphylococcus aureus* | 4 (3.8) |
| *Streptococcus anginosus* | 3 (2.9) |
| *Staphylococcus haemolyticus* | 3 (2.9) |
| Methicillin-Resistant *Staphylococcus aureus* | 2 (1.9) |
| **Gram-positive rods** |  |
| Corynebacterium | 3 (2.9) |
| unknown | 1 (1.0) |
| **Gram-negative rods** |  |
| *Escherichia coli* | 33 (31.7) |
| *Klebsiella pneumoniae* | 4 (3.8) |
| Extended Spectrum β-Lactamase | 3 (2.9) |
| *Pseudomonas aeruginosa* | 3 (2.9) |
| *Proteus mirabilis* | 3 (2.9) |
| *Enterobactor cloacae* | 2 (1.9) |
| *Citrobacter freundii* | 2 (1.9) |
| *Proteus vulgaris* | 2 (1.9) |
| *Providencia rettgeri* | 1 (1.0) |
| *Morganella morganii* | 1 (1.0) |
